# Supplementary material for: Higher bee abundance, but not pest abundance, in landscapes with more agriculture on a late-flowering legume crop in tropical smallholder farms
Source: PeerJ. 2021 Feb 19;9:e10732. doi: 10.7717/peerj.10732 (PMC7899018; doi:10.7717/peerj.10732)
Supplement: Supplemental Information 1 — Raw data showing with the total number of flowers and the number of damaged flowers per open cluster across three transects. The meaning of each variable is as follows: Village: Unique identifier for each site, can be used to link data to other data provided. Transect.no: Number used to identify at which visit to the site the data was recorded. Flower.ID: Unique identifier for each flower cluster, can be used to link the data to other data provided. Flowers.N: Number of flowers in the cluster upon visit. Damage.N: Number of flowers that showed signs of florifory at this visit.proportion.damage: ”Damage.N” divided by ”Flowers.N” showing the proportion of flowers damaged. [file peerj-09-10732-s001.xlsx]

## Sheet: Sheet1
Village	Transect.no	Flower.ID	Flowers.N	Damage.N	proportion.damage
V2	1	V2.Open.1	16	0	0
V2	1	V2.Open.2	27	0	0
V2	1	V2.Open.3	11	3	0.272727
V2	1	V2.Open.4	6	0	0
V2	1	V2.Open.5	15	0	0
V2	1	V2.Open.6	39	2	0.0512821
V2	1	V2.Open.7	14	0	0
V2	1	V2.Open.8	25	0	0
V2	1	V2.Open.9	18	0	0
V2	1	V2.Open.10	7	0	0
V2	1	V2.Open.11	11	1	0.0909091
V2	1	V2.Open.12	4	0	0
V2	1	V2.Open.13	24	0	0
V2	1	V2.Open.14	22	0	0
V2	1	V2.Open.15	24	0	0
V2	2	V2.Open.1	26	0	0
V2	2	V2.Open.2	25	0	0
V2	2	V2.Open.3	16	0	0
V2	2	V2.Open.4	4	1	0.25
V2	2	V2.Open.5	21	3	0.142857
V2	2	V2.Open.6	53	0	0
V2	2	V2.Open.7	21	2	0.0952381
V2	2	V2.Open.8	42	3	0.0714286
V2	2	V2.Open.9	25	2	0.08
V2	2	V2.Open.10	15	0	0
V2	2	V2.Open.11	11	6	0.545455
V2	2	V2.Open.12	14	0	0
V2	2	V2.Open.13	34	3	0.0882353
V2	2	V2.Open.14	21	4	0.190476
V2	2	V2.Open.15	23	0	0
V2	3	V2.Open.1	20	2	0.1
V2	3	V2.Open.2	39	2	0.0512821
V2	3	V2.Open.3	5	0	0
V2	3	V2.Open.4	16	0	0
V2	3	V2.Open.5	49	7	0.142857
V2	3	V2.Open.6	89	11	0.123596
V2	3	V2.Open.7	65	1	0.0153846
V2	3	V2.Open.8	54	2	0.037037
V2	3	V2.Open.9	15	4	0.266667
V2	3	V2.Open.10	19	0	0
V2	3	V2.Open.11	14	6	0.428571
V2	3	V2.Open.12	23	4	0.173913
V2	3	V2.Open.13	35	3	0.0857143
V2	3	V2.Open.14	29	11	0.37931
V2	3	V2.Open.15	28	5	0.178571
V4	1	V4.Open.1	30	4	0.133333
V4	1	V4.Open.2	5	0	0
V4	1	V4.Open.3	29	0	0
V4	1	V4.Open.4	8	0	0
V4	1	V4.Open.5	3	0	0
V4	1	V4.Open.6	3	0	0
V4	1	V4.Open.7	5	0	0
V4	1	V4.Open.8	18	2	0.111111
V4	1	V4.Open.9	5	0	0
V4	1	V4.Open.10	8	0	0
V4	1	V4.Open.11	4	0	0
V4	1	V4.Open.12	5	2	0.4
V4	1	V4.Open.13	4	0	0
V4	1	V4.Open.14	6	0	0
V4	1	V4.Open.15	13	1	0.0769231
V4	2	V4.Open.1	5	0	0
V4	2	V4.Open.2	5	0	0
V4	2	V4.Open.3	4	0	0
V4	2	V4.Open.4	8	0	0
V4	2	V4.Open.5	2	0	0
V4	2	V4.Open.6	3	0	0
V4	2	V4.Open.7	2	0	0
V4	2	V4.Open.8	17	4	0.235294
V4	2	V4.Open.9	7	0	0
V4	2	V4.Open.10	8	1	0.125
V4	2	V4.Open.11	6	0	0
V4	2	V4.Open.12	3	0	0
V4	2	V4.Open.13	4	0	0
V4	2	V4.Open.14	7	0	0
V4	2	V4.Open.15	16	4	0.25
V4	3	V4.Open.1	4	0	0
V4	3	V4.Open.2	5	0	0
V4	3	V4.Open.3	4	1	0.25
V4	3	V4.Open.4	13	0	0
V4	3	V4.Open.5	4	0	0
V4	3	V4.Open.6	9	0	0
V4	3	V4.Open.7	7	0	0
V4	3	V4.Open.8	17	0	0
V4	3	V4.Open.9	13	0	0
V4	3	V4.Open.10	6	2	0.333333
V4	3	V4.Open.11	12	0	0
V4	3	V4.Open.12	40	6	0.15
V4	3	V4.Open.13	32	8	0.25
V4	3	V4.Open.14	16	0	0
V4	3	V4.Open.15	29	4	0.137931
V26	1	V26.Open.1	6	0	0
V26	1	V26.Open.2	8	0	0
V26	1	V26.Open.3	5	0	0
V26	1	V26.Open.4	15	2	0.133333
V26	1	V26.Open.5	5	1	0.2
V26	1	V26.Open.6	21	0	0
V26	1	V26.Open.7	17	1	0.0588235
V26	1	V26.Open.8	4	1	0.25
V26	1	V26.Open.9	8	0	0
V26	1	V26.Open.10	9	0	0
V26	1	V26.Open.11	11	0	0
V26	1	V26.Open.12	2	0	0
V26	1	V26.Open.13	4	0	0
V26	1	V26.Open.14	9	0	0
V26	1	V26.Open.15	3	0	0
V26	2	V26.Open.1	8	0	0
V26	2	V26.Open.2	7	0	0
V26	2	V26.Open.3	3	0	0
V26	2	V26.Open.4	12	1	0.0833333
V26	2	V26.Open.5	6	1	0.166667
V26	2	V26.Open.6	4	0	0
V26	2	V26.Open.7	18	0	0
V26	2	V26.Open.8	4	0	0
V26	2	V26.Open.9	7	0	0
V26	2	V26.Open.10	5	0	0
V26	2	V26.Open.11	12	0	0
V26	2	V26.Open.12	3	0	0
V26	2	V26.Open.13	3	0	0
V26	2	V26.Open.14	6	0	0
V26	2	V26.Open.15	10	0	0
V26	3	V26.Open.1	9	0	0
V26	3	V26.Open.2	12	0	0
V26	3	V26.Open.3	5	0	0
V26	3	V26.Open.4	8	0	0
V26	3	V26.Open.5	3	0	0
V26	3	V26.Open.6	3	0	0
V26	3	V26.Open.7	3	0	0
V26	3	V26.Open.8	10	0	0
V26	3	V26.Open.9	4	0	0
V26	3	V26.Open.10	10	3	0.3
V26	3	V26.Open.11	0	0	0
V26	3	V26.Open.12	0	0	0
V26	3	V26.Open.13	0	0	0
V26	3	V26.Open.14	12	2	0.166667
V26	3	V26.Open.15	7	3	0.428571
V27	1	V27.Open.1	9	1	0.111111
V27	1	V27.Open.2	12	0	0
V27	1	V27.Open.3	10	0	0
V27	1	V27.Open.4	9	0	0
V27	1	V27.Open.5	9	1	0.111111
V27	1	V27.Open.6	12	0	0
V27	1	V27.Open.7	16	0	0
V27	1	V27.Open.8	25	1	0.04
V27	1	V27.Open.9	4	0	0
V27	1	V27.Open.10	20	0	0
V27	1	V27.Open.11	28	3	0.107143
V27	1	V27.Open.12	9	3	0.333333
V27	1	V27.Open.13	6	0	0
V27	1	V27.Open.14	6	1	0.166667
V27	1	V27.Open.15	4	2	0.5
V27	2	V27.Open.1	7	1	0.142857
V27	2	V27.Open.2	11	1	0.0909091
V27	2	V27.Open.3	12	0	0
V27	2	V27.Open.4	9	0	0
V27	2	V27.Open.5	6	0	0
V27	2	V27.Open.6	9	0	0
V27	2	V27.Open.7	6	2	0.333333
V27	2	V27.Open.8	31	5	0.16129
V27	2	V27.Open.9	5	1	0.2
V27	2	V27.Open.10	24	1	0.0416667
V27	2	V27.Open.11	23	1	0.0434783
V27	2	V27.Open.12	9	1	0.111111
V27	2	V27.Open.13	9	0	0
V27	2	V27.Open.14	5	2	0.4
V27	2	V27.Open.15	10	2	0.2
V27	3	V27.Open.1	10	2	0.2
V27	3	V27.Open.2	5	0	0
V27	3	V27.Open.3	9	0	0
V27	3	V27.Open.4	10	0	0
V27	3	V27.Open.5	6	0	0
V27	3	V27.Open.6	12	1	0.0833333
V27	3	V27.Open.7	6	0	0
V27	3	V27.Open.8	30	2	0.0666667
V27	3	V27.Open.9	4	0	0
V27	3	V27.Open.10	29	0	0
V27	3	V27.Open.11	32	1	0.03125
V27	3	V27.Open.12	9	1	0.111111
V27	3	V27.Open.13	10	0	0
V27	3	V27.Open.14	4	0	0
V27	3	V27.Open.15	8	0	0
V28	2	V28.Open.1	4	0	0
V28	2	V28.Open.2	11	2	0.181818
V28	2	V28.Open.3	5	0	0
V28	2	V28.Open.4	17	0	0
V28	2	V28.Open.5	9	0	0
V28	2	V28.Open.6	9	0	0
V28	2	V28.Open.7	12	0	0
V28	2	V28.Open.8	2	0	0
V28	2	V28.Open.9	2	0	0
V28	2	V28.Open.10	1	0	0
V28	2	V28.Open.11	2	0	0
V28	2	V28.Open.12	10	0	0
V28	2	V28.Open.13	6	1	0.166667
V28	2	V28.Open.14	16	0	0
V28	2	V28.Open.15	10	0	0
V28	3	V28.Open.1	4	0	0
V28	3	V28.Open.2	15	0	0
V28	3	V28.Open.3	4	0	0
V28	3	V28.Open.4	16	0	0
V28	3	V28.Open.5	10	0	0
V28	3	V28.Open.6	12	0	0
V28	3	V28.Open.7	16	0	0
V28	3	V28.Open.8	2	0	0
V28	3	V28.Open.9	5	0	0
V28	3	V28.Open.10	2	0	0
V28	3	V28.Open.11	4	0	0
V28	3	V28.Open.12	14	0	0
V28	3	V28.Open.13	3	0	0
V28	3	V28.Open.14	26	0	0
V28	3	V28.Open.15	16	0	0
V29	1	V29.Open.1	4	1	0.25
V29	1	V29.Open.2	15	3	0.2
V29	1	V29.Open.3	7	0	0
V29	1	V29.Open.4	2	0	0
V29	1	V29.Open.5	13	1	0.0769231
V29	1	V29.Open.6	4	0	0
V29	1	V29.Open.7	6	0	0
V29	1	V29.Open.8	21	1	0.047619
V29	1	V29.Open.9	6	0	0
V29	1	V29.Open.10	6	0	0
V29	1	V29.Open.11	8	0	0
V29	1	V29.Open.12	14	0	0
V29	1	V29.Open.13	4	0	0
V29	1	V29.Open.14	5	0	0
V29	1	V29.Open.15	12	3	0.25
V29	2	V29.Open.1	4	2	0.5
V29	2	V29.Open.2	11	0	0
V29	2	V29.Open.3	0	0	0
V29	2	V29.Open.4	13	0	0
V29	2	V29.Open.5	0	0	0
V29	2	V29.Open.6	9	0	0
V29	2	V29.Open.7	16	2	0.125
V29	2	V29.Open.8	9	0	0
V29	2	V29.Open.9	8	0	0
V29	2	V29.Open.10	14	3	0.214286
V29	2	V29.Open.11	17	0	0
V29	2	V29.Open.12	3	0	0
V29	2	V29.Open.13	18	0	0
V29	2	V29.Open.14	20	2	0.1
V29	2	V29.Open.15	4	4	1
V29	3	V29.Open.1	13	6	0.461538
V29	3	V29.Open.2	17	0	0
V29	3	V29.Open.3	15	2	0.133333
V29	3	V29.Open.4	0	0	0
V29	3	V29.Open.5	18	0	0
V29	3	V29.Open.6	0	0	0
V29	3	V29.Open.7	9	1	0.111111
V29	3	V29.Open.8	14	3	0.214286
V29	3	V29.Open.9	0	0	0
V29	3	V29.Open.10	26	3	0.115385
V29	3	V29.Open.11	16	0	0
V29	3	V29.Open.12	29	4	0.137931
V29	3	V29.Open.13	24	3	0.125
V29	3	V29.Open.14	20	0	0
V29	3	V29.Open.15	30	0	0
V30	1	V30.Open.1	21	3	0.142857
V30	1	V30.Open.2	3	1	0.333333
V30	1	V30.Open.3	3	0	0
V30	1	V30.Open.4	5	0	0
V30	1	V30.Open.5	21	0	0
V30	1	V30.Open.6	5	1	0.2
V30	1	V30.Open.7	12	0	0
V30	1	V30.Open.8	40	1	0.025
V30	1	V30.Open.9	5	0	0
V30	1	V30.Open.10	12	5	0.416667
V30	1	V30.Open.11	7	3	0.428571
V30	1	V30.Open.12	6	0	0
V30	1	V30.Open.13	9	1	0.111111
V30	1	V30.Open.14	9	4	0.444444
V30	1	V30.Open.15	18	4	0.222222
V30	2	V30.Open.1	25	3	0.12
V30	2	V30.Open.2	4	0	0
V30	2	V30.Open.3	4	1	0.25
V30	2	V30.Open.4	7	0	0
V30	2	V30.Open.5	20	1	0.05
V30	2	V30.Open.6	4	0	0
V30	2	V30.Open.7	14	1	0.0714286
V30	2	V30.Open.8	26	0	0
V30	2	V30.Open.9	8	2	0.25
V30	2	V30.Open.10	12	0	0
V30	2	V30.Open.11	7	1	0.142857
V30	2	V30.Open.12	5	0	0
V30	2	V30.Open.13	12	2	0.166667
V30	2	V30.Open.14	2	0	0
V30	2	V30.Open.15	11	0	0
V30	3	V30.Open.1	21	1	0.047619
V30	3	V30.Open.2	3	0	0
V30	3	V30.Open.3	4	0	0
V30	3	V30.Open.4	7	0	0
V30	3	V30.Open.5	18	2	0.111111
V30	3	V30.Open.6	5	1	0.2
V30	3	V30.Open.7	12	0	0
V30	3	V30.Open.8	42	5	0.119048
V30	3	V30.Open.9	6	2	0.333333
V30	3	V30.Open.10	16	4	0.25
V30	3	V30.Open.11	18	1	0.0555556
V30	3	V30.Open.12	6	0	0
V30	3	V30.Open.13	14	0	0
V30	3	V30.Open.14	13	0	0
V30	3	V30.Open.15	17	0	0
V32	1	V32.Open.1	6	2	0.333333
V32	1	V32.Open.2	13	0	0
V32	1	V32.Open.3	10	0	0
V32	1	V32.Open.4	11	0	0
V32	1	V32.Open.5	9	0	0
V32	1	V32.Open.6	7	0	0
V32	1	V32.Open.7	6	0	0
V32	1	V32.Open.8	18	1	0.0555556
V32	1	V32.Open.9	11	0	0
V32	1	V32.Open.10	7	0	0
V32	1	V32.Open.11	14	0	0
V32	1	V32.Open.12	5	1	0.2
V32	1	V32.Open.13	4	0	0
V32	1	V32.Open.14	10	0	0
V32	1	V32.Open.15	8	0	0
V32	2	V32.Open.1	7	0	0
V32	2	V32.Open.2	16	0	0
V32	2	V32.Open.3	8	0	0
V32	2	V32.Open.4	10	0	0
V32	2	V32.Open.5	10	0	0
V32	2	V32.Open.6	20	1	0.05
V32	2	V32.Open.7	3	0	0
V32	2	V32.Open.8	11	0	0
V32	2	V32.Open.9	13	0	0
V32	2	V32.Open.10	10	0	0
V32	2	V32.Open.11	27	0	0
V32	2	V32.Open.12	4	0	0
V32	2	V32.Open.13	5	0	0
V32	2	V32.Open.14	14	0	0
V32	2	V32.Open.15	13	1	0.0769231
V32	3	V32.Open.1	10	0	0
V32	3	V32.Open.2	22	1	0.0454545
V32	3	V32.Open.3	9	0	0
V32	3	V32.Open.4	10	2	0.2
V32	3	V32.Open.5	16	3	0.1875
V32	3	V32.Open.6	19	1	0.0526316
V32	3	V32.Open.7	5	2	0.4
V32	3	V32.Open.8	8	2	0.25
V32	3	V32.Open.9	12	1	0.0833333
V32	3	V32.Open.10	10	0	0
V32	3	V32.Open.11	32	0	0
V32	3	V32.Open.12	3	0	0
V32	3	V32.Open.13	4	0	0
V32	3	V32.Open.14	17	1	0.0588235
V32	3	V32.Open.15	17	0	0
V25	2	V25.Open.1	18	0	0
V25	2	V25.Open.2	20	0	0
V25	2	V25.Open.3	55	0	0
V25	2	V25.Open.4	21	2	0.0952381
V25	2	V25.Open.5	41	0	0
V25	2	V25.Open.6	15	1	0.0666667
V25	2	V25.Open.7	1	0	0
V25	2	V25.Open.8	33	4	0.121212
V25	2	V25.Open.9	15	0	0
V25	2	V25.Open.10	24	0	0
V25	2	V25.Open.11	19	0	0
V25	2	V25.Open.12	39	0	0
V25	2	V25.Open.13	7	0	0
V25	2	V25.Open.14	31	0	0
V25	2	V25.Open.15	24	3	0.125
V25	3	V25.Open.1	14	0	0
V25	3	V25.Open.2	14	0	0
V25	3	V25.Open.3	28	2	0.0714286
V25	3	V25.Open.4	16	0	0
V25	3	V25.Open.5	25	2	0.08
V25	3	V25.Open.6	13	3	0.230769
V25	3	V25.Open.7	9	5	0.555556
V25	3	V25.Open.8	28	0	0
V25	3	V25.Open.9	12	2	0.166667
V25	3	V25.Open.10	15	3	0.2
V25	3	V25.Open.11	11	3	0.272727
V25	3	V25.Open.12	23	0	0
V25	3	V25.Open.13	19	5	0.263158
V25	3	V25.Open.14	11	4	0.363636
V25	3	V25.Open.15	34	0	0
V31	1	V31.Open.1	27	0	0
V31	1	V31.Open.2	29	1	0.0344828
V31	1	V31.Open.3	4	0	0
V31	1	V31.Open.4	5	1	0.2
V31	1	V31.Open.5	5	0	0
V31	1	V31.Open.6	5	0	0
V31	1	V31.Open.7	5	2	0.4
V31	1	V31.Open.8	5	2	0.4
V31	1	V31.Open.9	4	0	0
V31	1	V31.Open.10	24	0	0
V31	1	V31.Open.11	9	4	0.444444
V31	1	V31.Open.12	6	0	0
V31	1	V31.Open.13	4	0	0
V31	1	V31.Open.14	4	0	0
V31	1	V31.Open.15	6	0	0
V31	2	V31.Open.1	6	4	0.666667
V31	2	V31.Open.2	30	0	0
V31	2	V31.Open.3	4	0	0
V31	2	V31.Open.4	18	0	0
V31	2	V31.Open.5	4	0	0
V31	2	V31.Open.6	42	0	0
V31	2	V31.Open.7	6	1	0.166667
V31	2	V31.Open.8	21	0	0
V31	2	V31.Open.9	4	0	0
V31	2	V31.Open.10	28	0	0
V31	2	V31.Open.11	4	0	0
V31	2	V31.Open.12	4	0	0
V31	2	V31.Open.13	15	0	0
V31	2	V31.Open.14	29	0	0
V31	2	V31.Open.15	44	0	0
V31	3	V31.Open.1	25	0	0
V31	3	V31.Open.2	30	1	0.0333333
V31	3	V31.Open.3	3	1	0.333333
V31	3	V31.Open.4	3	0	0
V31	3	V31.Open.5	4	1	0.25
V31	3	V31.Open.6	3	1	0.333333
V31	3	V31.Open.7	4	0	0
V31	3	V31.Open.8	18	3	0.166667
V31	3	V31.Open.9	4	1	0.25
V31	3	V31.Open.10	30	4	0.133333
V31	3	V31.Open.11	3	0	0
V31	3	V31.Open.12	2	1	0.5
V31	3	V31.Open.13	19	0	0
V31	3	V31.Open.14	1	0	0
V31	3	V31.Open.15	37	4	0.108108
