# Supplementary material for: Higher bee abundance, but not pest abundance, in landscapes with more agriculture on a late-flowering legume crop in tropical smallholder farms
Source: PeerJ. 2021 Feb 19;9:e10732. doi: 10.7717/peerj.10732 (PMC7899018; doi:10.7717/peerj.10732)
Supplement: Supplemental Information 2 — Raw data of fruit set of each of the tagged clusters. The meaning of each variable is as follows: Village: Unique identifier for each site, can be used to link data to other data provided. Plant.ID: Unique idenitifier for each marked plant containing a bagged and open cluster. Treatment: Indicates if a cluster was bagged or open. Flower.ID: Unique identifier for each flower cluster, can be used to link the data to other data provided. record.date: Date when the data was recorded. N.flowers: Number of flowers originally contained within the cluster. N.fruit: Number of pods produced within the cluster. fruitset: The proportion of flowers that formed pods. comments: Any additional information useful for interpertation of the data. [file peerj-09-10732-s002.xlsx]

## Sheet: Sheet1
Village	Plant.ID	Treatment	Flower.ID	record.date	N.flowers	N.fruit	fruitset	Comments
V2	V2.1	Bagged	V2.Bagged.1	2019-07-25	10	1	0.1	NA
V2	V2.2	Bagged	V2.Bagged.2	2019-07-25	2	2	1	NA
V2	V2.3	Bagged	V2.Bagged.3	NA	NA	NA	NA	Lost
V2	V2.4	Bagged	V2.Bagged.4	2019-07-25	17	17	1	NA
V2	V2.5	Bagged	V2.Bagged.5	2019-08-02	10	3	0.3	NA
V2	V2.6	Bagged	V2.Bagged.6	2019-07-25	25	21	0.84	NA
V2	V2.7	Bagged	V2.Bagged.7	2019-08-02	17	17	1	NA
V2	V2.8	Bagged	V2.Bagged.8	2019-08-02	17	17	1	NA
V2	V2.9	Bagged	V2.Bagged.9	2019-08-02	13	2	0.15	NA
V2	V2.10	Bagged	V2.Bagged.10	NA	NA	NA	NA	Lost
V2	V2.11	Bagged	V2.Bagged.11	2019-08-02	32	7	0.21875	NA
V2	V2.12	Bagged	V2.Bagged.12	2019-07-03	10	0	0	NA
V2	V2.13	Bagged	V2.Bagged.13	2019-07-03	3	1	0.33	NA
V2	V2.14	Bagged	V2.Bagged.14	NA	NA	NA	NA	NA
V2	V2.15	Bagged	V2.Bagged.15	2019-07-03	20	0	0	NA
V2	V2.1	Open	V2.Open.1	2019-07-03	11	0	0	NA
V2	V2.2	Open	V2.Open.2	2019-07-03	25	0	0	NA
V2	V2.3	Open	V2.Open.3	NA	NA	NA	NA	Lost
V2	V2.4	Open	V2.Open.4	2019-07-03	12	0	0	NA
V2	V2.5	Open	V2.Open.5	2019-08-02	4	1	0.25	NA
V2	V2.6	Open	V2.Open.6	2019-07-25	47	6	0.12766	NA
V2	V2.7	Open	V2.Open.7	2019-08-02	8	1	0.125	NA
V2	V2.8	Open	V2.Open.8	2019-08-02	30	3	0.1	NA
V2	V2.9	Open	V2.Open.9	2019-08-02	12	1	0.083333	NA
V2	V2.10	Open	V2.Open.10	NA	NA	NA	NA	Lost
V2	V2.11	Open	V2.Open.11	2019-07-25	18	3	0.166667	NA
V2	V2.12	Open	V2.Open.12	2019-07-03	16	0	0	NA
V2	V2.13	Open	V2.Open.13	2019-07-25	15	1	0.0666667	NA
V2	V2.14	Open	V2.Open.14	2019-07-03	0	0	0	NA
V2	V2.15	Open	V2.Open.15	2019-07-03	28	0	0	NA
V25	V25.1	Bagged	V25.Bagged.1	NA	NA	NA	NA	Lost
V25	V25.2	Bagged	V25.Bagged.2	2019-07-03	6	0	0	NA
V25	V25.3	Bagged	V25.Bagged.3	2019-07-25	6	0	0	NA
V25	V25.4	Bagged	V25.Bagged.4	2019-07-25	13	0	0	NA
V25	V25.5	Bagged	V25.Bagged.5	2019-07-25	11	1	0.0909091	NA
V25	V25.6	Bagged	V25.Bagged.6	NA	NA	NA	NA	Lost
V25	V25.7	Bagged	V25.Bagged.7	2019-07-03	7	0	0	NA
V25	V25.8	Bagged	V25.Bagged.8	2019-07-03	10	0	0	NA
V25	V25.9	Bagged	V25.Bagged.9	2019-07-03	13	1	0.0769231	NA
V25	V25.10	Bagged	V25.Bagged.10	2019-08-02	1	1	1	NA
V25	V25.11	Bagged	V25.Bagged.11	NA	NA	NA	NA	Lost
V25	V25.12	Bagged	V25.Bagged.12	2019-07-03	8	0	0	NA
V25	V25.13	Bagged	V25.Bagged.13	NA	NA	NA	NA	Lost
V25	V25.14	Bagged	V25.Bagged.14	2019-07-03	15	0	0	NA
V25	V25.15	Bagged	V25.Bagged.15	2019-07-03	9	2	0.222222	NA
V25	V25.1	Open	V25.Open.1	2019-07-03	2	2	1	NA
V25	V25.2	Open	V25.Open.2	2019-07-25	9	3	0.333333	NA
V25	V25.3	Open	V25.Open.3	2019-07-03	22	6	0.272727	NA
V25	V25.4	Open	V25.Open.4	2019-07-03	3	3	1	NA
V25	V25.5	Open	V25.Open.5	2019-07-03	7	1	0.142857	NA
V25	V25.6	Open	V25.Open.6	2019-07-03	9	2	0.222222	NA
V25	V25.7	Open	V25.Open.7	2019-07-03	5	5	1	NA
V25	V25.8	Open	V25.Open.8	2019-07-25	5	1	0.2	NA
V25	V25.9	Open	V25.Open.9	2019-07-25	10	3	0.3	NA
V25	V25.10	Open	V25.Open.10	2019-07-03	3	3	1	NA
V25	V25.11	Open	V25.Open.11	2019-07-03	7	7	1	NA
V25	V25.12	Open	V25.Open.12	2019-07-03	12	9	0.75	NA
V25	V25.13	Open	V25.Open.13	2019-07-03	6	0	0	NA
V25	V25.14	Open	V25.Open.14	2019-07-03	20	8	0.4	NA
V25	V25.15	Open	V25.Open.15	2019-07-03	13	4	0.307692	NA
V26	V26.1	Bagged	V26.Bagged.1	2019-08-02	5	0	0	NA
V26	V26.2	Bagged	V26.Bagged.2	NA	NA	NA	NA	Lost
V26	V26.3	Bagged	V26.Bagged.3	NA	NA	NA	NA	Lost
V26	V26.4	Bagged	V26.Bagged.4	2019-07-25	7	1	0.142857	NA
V26	V26.5	Bagged	V26.Bagged.5	2019-07-03	3	0	0	NA
V26	V26.6	Bagged	V26.Bagged.6	NA	NA	NA	NA	Lost
V26	V26.7	Bagged	V26.Bagged.7	2019-07-03	5	2	0.4	NA
V26	V26.8	Bagged	V26.Bagged.8	2019-07-25	5	5	1	NA
V26	V26.9	Bagged	V26.Bagged.9	NA	NA	NA	NA	Lost
V26	V26.10	Bagged	V26.Bagged.10	NA	NA	NA	NA	Lost
V26	V26.11	Bagged	V26.Bagged.11	2019-07-03	5	1	0.2	NA
V26	V26.12	Bagged	V26.Bagged.12	NA	NA	NA	NA	Lost
V26	V26.13	Bagged	V26.Bagged.13	2019-07-25	6	1	0.166667	NA
V26	V26.14	Bagged	V26.Bagged.14	2019-07-03	6	2	0.3333	NA
V26	V26.15	Bagged	V26.Bagged.15	2019-07-03	1	1	1	Empty pods
V26	V26.1	Open	V26.Open.1	NA	NA	NA	NA	Lost
V26	V26.2	Open	V26.Open.2	NA	NA	NA	NA	Lost
V26	V26.3	Open	V26.Open.3	NA	NA	NA	NA	Lost
V26	V26.4	Open	V26.Open.4	2019-07-25	6	2	0.33333	NA
V26	V26.5	Open	V26.Open.5	2019-07-25	2	2	1	NA
V26	V26.6	Open	V26.Open.6	2019-07-03	21	0	0	NA
V26	V26.7	Open	V26.Open.7	2019-07-03	3	0	0	NA
V26	V26.8	Open	V26.Open.8	2019-07-03	5	5	1	NA
V26	V26.9	Open	V26.Open.9	NA	NA	NA	NA	Lost
V26	V26.10	Open	V26.Open.10	NA	NA	NA	NA	Lost
V26	V26.11	Open	V26.Open.11	2019-07-03	5	0	0	NA
V26	V26.12	Open	V26.Open.12	NA	NA	NA	NA	Lost
V26	V26.13	Open	V26.Open.13	2019-07-03	5	5	1	NA
V26	V26.14	Open	V26.Open.14	2019-07-03	2	0	0	NA
V26	V26.15	Open	V26.Open.15	NA	NA	NA	NA	Lost
V27	V27.1	Bagged	V27.Bagged.1	2019-07-25	3	3	1	NA
V27	V27.2	Bagged	V27.Bagged.2	2019-07-03	13	0	0	NA
V27	V27.3	Bagged	V27.Bagged.3	2019-07-03	13	0	0	NA
V27	V27.4	Bagged	V27.Bagged.4	2019-07-03	6	1	0.166667	NA
V27	V27.5	Bagged	V27.Bagged.5	2019-07-03	14	5	0.357143	NA
V27	V27.6	Bagged	V27.Bagged.6	2020-07-03	6	2	0.333333	NA
V27	V27.7	Bagged	V27.Bagged.7	2019-07-03	13	5	0.384615	NA
V27	V27.8	Bagged	V27.Bagged.8	2019-07-03	6	0	0	NA
V27	V27.9	Bagged	V27.Bagged.9	2019-07-03	21	0	0	NA
V27	V27.10	Bagged	V27.Bagged.10	2019-07-03	1	0	0	NA
V27	V27.11	Bagged	V27.Bagged.11	2019-07-25	7	4	0.571429	NA
V27	V27.12	Bagged	V27.Bagged.12	2019-08-02	11	0	0	NA
V27	V27.13	Bagged	V27.Bagged.13	2019-07-03	7	0	0	NA
V27	V27.14	Bagged	V27.Bagged.14	2019-08-02	4	0	0	NA
V27	V27.15	Bagged	V27.Bagged.15	2019-07-25	12	7	0.583333	NA
V27	V27.1	Open	V27.Open.1	2019-07-25	18	18	1	NA
V27	V27.2	Open	V27.Open.2	2019-07-03	15	0	0	NA
V27	V27.3	Open	V27.Open.3	2019-07-03	11	0	0	NA
V27	V27.4	Open	V27.Open.4	2019-07-03	17	0	0	NA
V27	V27.5	Open	V27.Open.5	2019-07-03	3	0	0	NA
V27	V27.6	Open	V27.Open.6	2019-07-03	17	0	0	NA
V27	V27.7	Open	V27.Open.7	2019-07-03	8	2	0.25	NA
V27	V27.8	Open	V27.Open.8	2019-07-03	6	3	0.5	NA
V27	V27.9	Open	V27.Open.9	2019-08-02	5	1	0.2	NA
V27	V27.10	Open	V27.Open.10	2019-07-03	8	0	0	NA
V27	V27.11	Open	V27.Open.11	2019-07-25	13	3	0.230769	NA
V27	V27.12	Open	V27.Open.12	NA	NA	NA	NA	Lost
V27	V27.13	Open	V27.Open.13	2019-07-03	11	0	0	NA
V27	V27.14	Open	V27.Open.14	2019-07-03	12	12	1	NA
V27	V27.15	Open	V27.Open.15	2019-07-25	10	10	1	NA
V28	V28.1	Bagged	V28.Bagged.1	2019-07-03	3	3	1	NA
V28	V28.2	Bagged	V28.Bagged.2	2019-07-25	1	1	1	NA
V28	V28.3	Bagged	V28.Bagged.3	2019-08-02	3	0	0	NA
V28	V28.4	Bagged	V28.Bagged.4	NA	NA	NA	NA	Lost
V28	V28.5	Bagged	V28.Bagged.5	2019-07-03	9	3	0.33333	NA
V28	V28.6	Bagged	V28.Bagged.6	03/07/209	13	0	0	NA
V28	V28.7	Bagged	V28.Bagged.7	2019-07-03	5	0	0	NA
V28	V28.8	Bagged	V28.Bagged.8	NA	NA	NA	NA	Lost
V28	V28.9	Bagged	V28.Bagged.9	NA	NA	NA	NA	Lost
V28	V28.10	Bagged	V28.Bagged.10	2019-07-03	1	1	1	Empty pods
V28	V28.11	Bagged	V28.Bagged.11	2019-07-25	2	2	1	NA
V28	V28.12	Bagged	V28.Bagged.12	NA	NA	NA	NA	Lost
V28	V28.13	Bagged	V28.Bagged.13	2019-07-03	5	1	0.2	NA
V28	V28.14	Bagged	V28.Bagged.14	2019-07-03	6	0	0	NA
V28	V28.15	Bagged	V28.Bagged.15	NA	NA	NA	NA	Lost
V28	V28.1	Open	V28.Open.1	2019-07-03	4	4	1	NA
V28	V28.2	Open	V28.Open.2	2019-07-03	1	1	1	NA
V28	V28.3	Open	V28.Open.3	2019-07-03	5	0	0	NA
V28	V28.4	Open	V28.Open.4	2019-08-02	1	0	0	NA
V28	V28.5	Open	V28.Open.5	2019-07-25	1	1	1	NA
V28	V28.6	Open	V28.Open.6	2019-07-25	2	2	1	NA
V28	V28.7	Open	V28.Open.7	2019-07-25	1	1	1	NA
V28	V28.8	Open	V28.Open.8	2019-07-03	2	2	1	NA
V28	V28.9	Open	V28.Open.9	2019-07-03	3	3	1	NA
V28	V28.10	Open	V28.Open.10	2019-07-25	6	6	1	NA
V28	V28.11	Open	V28.Open.11	2019-07-03	8	5	0.625	NA
V28	V28.12	Open	V28.Open.12	2019-07-03	1	1	1	NA
V28	V28.13	Open	V28.Open.13	2019-07-03	10	7	0.7	NA
V28	V28.14	Open	V28.Open.14	2019-07-03	11	1	0.0909091	NA
V28	V28.15	Open	V28.Open.15	NA	NA	NA	NA	Lost
V29	V29.1	Bagged	V29.Bagged.1	NA	NA	NA	NA	Lost
V29	V29.2	Bagged	V29.Bagged.2	2019-07-03	13	0	0	NA
V29	V29.3	Bagged	V29.Bagged.3	2019-07-03	10	0	0	NA
V29	V29.4	Bagged	V29.Bagged.4	2019-07-03	6	0	0	NA
V29	V29.5	Bagged	V29.Bagged.5	2019-07-03	26	0	0	NA
V29	V29.6	Bagged	V29.Bagged.6	2019-07-03	12	0	0	NA
V29	V29.7	Bagged	V29.Bagged.7	NA	NA	NA	NA	Lost
V29	V29.8	Bagged	V29.Bagged.8	2019-08-02	4	0	0	NA
V29	V29.9	Bagged	V29.Bagged.9	NA	NA	NA	NA	Lost
V29	V29.10	Bagged	V29.Bagged.10	2019-07-03	11	0	0	NA
V29	V29.11	Bagged	V29.Bagged.11	2019-07-03	11	0	0	NA
V29	V29.12	Bagged	V29.Bagged.12	2019-07-03	2	0	0	NA
V29	V29.13	Bagged	V29.Bagged.13	2019-08-02	14	2	0.142857	NA
V29	V29.14	Bagged	V29.Bagged.14	2019-07-25	1	1	1	NA
V29	V29.15	Bagged	V29.Bagged.15	2019-07-03	3	0	0	NA
V29	V29.1	Open	V29.Open.1	NA	NA	NA	NA	Lost
V29	V29.2	Open	V29.Open.2	2019-07-03	13	0	0	NA
V29	V29.3	Open	V29.Open.3	2019-07-25	17	4	0.235294	NA
V29	V29.4	Open	V29.Open.4	2019-07-25	26	8	0.307692	NA
V29	V29.5	Open	V29.Open.5	2019-07-03	13	0	0	NA
V29	V29.6	Open	V29.Open.6	2019-07-03	14	0	0	NA
V29	V29.7	Open	V29.Open.7	2019-07-03	5	0	0	NA
V29	V29.8	Open	V29.Open.8	2019-07-03	5	0	0	NA
V29	V29.9	Open	V29.Open.9	2019-07-25	6	0	0	NA
V29	V29.10	Open	V29.Open.10	2019-08-02	7	3	0.428571	NA
V29	V29.11	Open	V29.Open.11	2019-07-03	3	1	0.333333	NA
V29	V29.12	Open	V29.Open.12	2019-07-03	15	0	0	NA
V29	V29.13	Open	V29.Open.13	2019-08-02	20	2	0.1	NA
V29	V29.14	Open	V29.Open.14	2019-07-03	3	1	0.333333	NA
V29	V29.15	Open	V29.Open.15	2019-07-25	16	1	0.0625	NA
V30	V30.1	Bagged	V30.Bagged.1	2019-08-02	5	1	0.2	NA
V30	V30.2	Bagged	V30.Bagged.2	2019-07-03	6	0	0	NA
V30	V30.3	Bagged	V30.Bagged.3	2019-07-03	1	0	0	NA
V30	V30.4	Bagged	V30.Bagged.4	NA	NA	NA	NA	Lost
V30	V30.5	Bagged	V30.Bagged.5	2019-07-25	7	7	1	NA
V30	V30.6	Bagged	V30.Bagged.6	NA	NA	NA	NA	Lost
V30	V30.7	Bagged	V30.Bagged.7	NA	NA	NA	NA	Lost
V30	V30.8	Bagged	V30.Bagged.8	2019-07-03	7	1	0.142857	NA
V30	V30.9	Bagged	V30.Bagged.9	2019-07-25	3	1	0.333333	NA
V30	V30.10	Bagged	V30.Bagged.10	2019-07-03	3	0	0	NA
V30	V30.11	Bagged	V30.Bagged.11	NA	NA	NA	NA	Lost
V30	V30.12	Bagged	V30.Bagged.12	2019-07-25	2	0	0	NA
V30	V30.13	Bagged	V30.Bagged.13	2019-07-25	4	1	0.25	NA
V30	V30.14	Bagged	V30.Bagged.14	NA	NA	NA	NA	Lost
V30	V30.15	Bagged	V30.Bagged.15	2019-07-03	5	0	0	NA
V30	V30.1	Open	V30.Open.1	2019-05-25	5	5	1	NA
V30	V30.2	Open	V30.Open.2	2019-07-25	3	3	1	NA
V30	V30.3	Open	V30.Open.3	2019-07-03	11	0	0	NA
V30	V30.4	Open	V30.Open.4	NA	NA	NA	NA	Lost
V30	V30.5	Open	V30.Open.5	2019-07-25	4	4	1	NA
V30	V30.6	Open	V30.Open.6	2019-07-03	9	0	0	NA
V30	V30.7	Open	V30.Open.7	NA	NA	NA	NA	Lost
V30	V30.8	Open	V30.Open.8	2019-07-03	10	0	0	NA
V30	V30.9	Open	V30.Open.9	2019-08-02	3	3	1	NA
V30	V30.10	Open	V30.Open.10	2019-07-03	6	0	0	NA
V30	V30.11	Open	V30.Open.11	NA	NA	NA	NA	Lost
V30	V30.12	Open	V30.Open.12	2019-08-02	6	3	0.5	NA
V30	V30.13	Open	V30.Open.13	2019-07-03	12	0	0	NA
V30	V30.14	Open	V30.Open.14	2019-07-03	12	0	0	NA
V30	V30.15	Open	V30.Open.15	2019-07-03	15	0	0	NA
V31	V31.1	Bagged	V31.Bagged.1	2019-07-03	5	0	0	NA
V31	V31.2	Bagged	V31.Bagged.2	2019-07-03	8	0	0	NA
V31	V31.3	Bagged	V31.Bagged.3	2019-07-03	1	0	0	NA
V31	V31.4	Bagged	V31.Bagged.4	NA	NA	NA	NA	Lost
V31	V31.5	Bagged	V31.Bagged.5	2019-07-25	1	1	1	NA
V31	V31.6	Bagged	V31.Bagged.6	2019-07-03	4	0	0	NA
V31	V31.7	Bagged	V31.Bagged.7	2019-07-03	3	1	0.333333	NA
V31	V31.8	Bagged	V31.Bagged.8	NA	NA	NA	NA	NA
V31	V31.9	Bagged	V31.Bagged.9	2019-08-02	5	1	0.2	NA
V31	V31.10	Bagged	V31.Bagged.10	2019-07-03	1	1	1	NA
V31	V31.11	Bagged	V31.Bagged.11	NA	NA	NA	NA	Lost
V31	V31.12	Bagged	V31.Bagged.12	2019-07-03	16	0	0	NA
V31	V31.13	Bagged	V31.Bagged.13	2019-07-03	15	1	0.0666667	NA
V31	V31.14	Bagged	V31.Bagged.14	2019-07-25	16	0	0	NA
V31	V31.15	Bagged	V31.Bagged.15	2019-07-25	16	0	0	NA
V31	V31.1	Open	V31.Open.1	2019-07-03	6	0	0	NA
V31	V31.2	Open	V31.Open.2	2019-07-03	21	0	0	NA
V31	V31.3	Open	V31.Open.3	2019-07-03	3	1	0.333333	NA
V31	V31.4	Open	V31.Open.4	2019-07-03	20	0	0	NA
V31	V31.5	Open	V31.Open.5	2019-07-25	4	4	1	NA
V31	V31.6	Open	V31.Open.6	2019-07-25	11	0	0	NA
V31	V31.7	Open	V31.Open.7	2019-07-25	3	1	0.33333	NA
V31	V31.8	Open	V31.Open.8	NA	NA	NA	NA	Lost
V31	V31.9	Open	V31.Open.9	2019-07-03	3	3	1	NA
V31	V31.10	Open	V31.Open.10	2019-07-03	10	1	0.1	NA
V31	V31.11	Open	V31.Open.11	NA	NA	NA	NA	Lost
V31	V31.12	Open	V31.Open.12	2019-07-03	12	0	0	NA
V31	V31.13	Open	V31.Open.13	2019-07-25	14	0	0	NA
V31	V31.14	Open	V31.Open.14	2019-07-25	9	0	0	NA
V31	V31.15	Open	V31.Open.15	2019-07-03	13	0	0	NA
V4	V4.1	Bagged	V4.Bagged.1	2019-07-03	3	0	0	NA
V4	V4.2	Bagged	V4.Bagged.2	2019-07-03	4	0	0	NA
V4	V4.3	Bagged	V4.Bagged.3	2019-07-03	8	0	0	NA
V4	V4.4	Bagged	V4.Bagged.4	2019-08-02	9	0	0	NA
V4	V4.5	Bagged	V4.Bagged.5	2019-07-03	11	0	0	NA
V4	V4.6	Bagged	V4.Bagged.6	2019-07-03	8	0	0	NA
V4	V4.7	Bagged	V4.Bagged.7	2019-07-03	11	0	0	NA
V4	V4.8	Bagged	V4.Bagged.8	NA	NA		NA	Lost
V4	V4.9	Bagged	V4.Bagged.9	2019-07-03	3	1	0.33333	NA
V4	V4.10	Bagged	V4.Bagged.10	2019-07-25	12	3	0.25	NA
V4	V4.11	Bagged	V4.Bagged.11	2019-07-03	3	0	0	NA
V4	V4.12	Bagged	V4.Bagged.12	2019-08-02	5	1	0.2	NA
V4	V4.13	Bagged	V4.Bagged.13	2019-08-02	9	1	0.111111	NA
V4	V4.14	Bagged	V4.Bagged.14	2019-07-03	19	0	0	NA
V4	V4.15	Bagged	V4.Bagged.15	2019-08-02	15	2	0.133333	NA
V4	V4.1	Open	V4.Open.1	2019-07-03	2	2	1	NA
V4	V4.2	Open	V4.Open.2	2019-08-02	6	2	0.333333	NA
V4	V4.3	Open	V4.Open.3	2019-07-25	28	3	0.107143	NA
V4	V4.4	Open	V4.Open.4	2019-07-03	20	1	0.05	NA
V4	V4.5	Open	V4.Open.5	2019-07-03	9	0	0	NA
V4	V4.6	Open	V4.Open.6	2019-07-25	1	1	1	NA
V4	V4.7	Open	V4.Open.7	2019-08-02	12	2	0.166667	NA
V4	V4.8	Open	V4.Open.8	2019-07-03	5	5	1	NA
V4	V4.9	Open	V4.Open.9	2019-07-03	15	0	0	NA
V4	V4.10	Open	V4.Open.10	NA	NA	NA	NA	Lost
V4	V4.11	Open	V4.Open.11	2019-07-03	13	0	0	NA
V4	V4.12	Open	V4.Open.12	2019-07-25	15	4	0.266667	NA
V4	V4.13	Open	V4.Open.13	2019-07-03	32	1	0.03125	NA
V4	V4.14	Open	V4.Open.14	2019-08-02	12	4	0.33333	NA
V4	V4.15	Open	V4.Open.15	2019-07-25	29	5	0.172414	NA
