# Supplementary material for: Higher bee abundance, but not pest abundance, in landscapes with more agriculture on a late-flowering legume crop in tropical smallholder farms
Source: PeerJ. 2021 Feb 19;9:e10732. doi: 10.7717/peerj.10732 (PMC7899018; doi:10.7717/peerj.10732)
Supplement: Supplemental Information 3 — Raw data containing individual transect summaries and the animals collected in them. The meaning of each variable is as follows: Village: Unique identifier for each site, can be used to link data to other data provided. Transect.no: Number used to identify at which visit to the site the data was recorded. Transect.ID: Unique identifier for each transect walked. Date: Date transect was performed. Time: Time of day transect was initiated. Rows F-S: Number of individuals of each species counted within the specific transect. [file peerj-09-10732-s003.xlsx]

## Sheet: Sheet1
Village	Transect.no	Transect.ID	Date	Time	Blister.beetles	A.mellifera	Nomia.1	Megachile.1	Megachile.2	Megachile.3	Megachile.4	Megachile.5	Megachile.6	Megachile.7	Megachile.8	M.caricina	Xylocopa.1	Xylocopa.2
V2	1	V2.tr1	2019-05-16	13:15:00	0	2	0	0	0	0	0	0	0	0	0	0	0	0
V2	2	V2.tr2	2019-05-27	11:10:00	1	0	0	0	0	0	0	0	0	0	0	0	0	0
V2	3	V2.tr3	2019-05-19	11:55:00	3	0	0	0	0	0	0	0	0	0	0	0	0	0
V4	1	V4.tr1	2019-05-17	10:35:00	0	0	0	0	0	0	0	0	0	0	0	0	0	0
V4	2	V4.tr2	2019-05-22	11:20:00	0	0	0	0	0	0	0	0	0	0	0	0	0	0
V4	3	V4.tr3	2019-05-29	10:45:00	0	0	0	0	0	0	0	0	0	0	0	0	0	0
V26	1	V26.tr1	2019-05-16	14:25:00	0	1	1	0	0	0	0	0	0	0	0	0	0	0
V26	2	V26.tr2	2019-05-22	13:25:00	0	1	1	0	0	0	0	0	0	0	0	0	0	0
V26	3	V26.tr3	2019-05-27	14:05:00	0	2	0	0	0	0	0	0	0	0	0	0	0	0
V27	1	V27.tr1	2019-05-16	15:20:00	0	0	0	0	0	0	0	0	0	0	0	0	0	0
V27	2	V27.tr2	2019-05-11	14:20:00	0	0	0	0	0	0	0	0	0	0	0	0	0	0
V27	3	V27.tr3	2019-05-27	15:05:00	0	0	0	0	0	0	1	0	0	0	1	0	0	0
V28	1	V28.tr1	2019-05-08	11:00:00	0	1	0	1	1	1	3	0	0	0	0	0	1	0
V28	2	V28.tr2	2019-05-20	12:40:00	2	1	0	2	0	0	0	0	2	1	0	0	1	0
V28	3	V28.tr3	2019-05-28	09:40:00	0	0	0	0	0	0	0	0	0	0	0	1	0	0
V29	1	V29.tr1	2019-05-15	13:50:00	0	0	0	0	0	0	0	0	0	0	0	0	0	0
V29	2	V29.tr2	2019-05-20	13:22:00	0	0	0	0	0	0	0	0	0	0	0	0	1	0
V29	3	V29.tr3	2019-05-28	08:10:00	0	2	0	0	0	0	0	0	0	0	0	0	0	0
V30	1	V30.tr1	2019-05-15	14:40:00	23	6	0	0	0	0	0	0	0	0	0	0	0	0
V30	2	V30.tr2	2019-05-20	14:30:00	21	11	1	0	0	0	0	0	0	0	0	0	0	0
V30	3	V30.tr3	2019-05-28	11:05:00	14	4	0	0	0	0	0	0	0	0	0	0	0	0
V32	1	V32.tr1	2019-05-16	11:25:00	4	0	0	0	1	0	0	0	1	0	0	0	0	1
V32	2	V32.tr2	2019-05-27	12:51:00	4	1	0	0	0	0	0	0	1	1	0	0	0	0
V32	3	V32.tr3	2019-05-29	12:41:00	4	1	0	0	0	0	0	0	0	0	0	0	0	0
V25	1	V25.tr1	2019-05-08	13:30:00	0	0	0	0	0	0	2	1	1	0	0	0	0	0
V25	2	V25.tr2	2019-05-20	10:15:00	1	1	0	0	0	0	0	1	0	0	0	0	0	0
V25	3	V25.tr3	2019-05-23	13:20:00	3	0	1	1	0	0	0	0	0	0	0	0	0	0
V31	1	V31.tr1	2019-05-15	15:50:00	13	7	0	0	0	0	0	0	0	0	0	0	0	0
V31	2	V31.tr2	2019-05-20	10:50:00	14	4	0	0	0	0	0	0	0	0	0	0	0	0
V31	3	V31.tr3	2019-05-23	13:50:00	20	7	0	0	0	0	0	0	0	0	0	0	0	0
