# Supplementary material for: Higher bee abundance, but not pest abundance, in landscapes with more agriculture on a late-flowering legume crop in tropical smallholder farms
Source: PeerJ. 2021 Feb 19;9:e10732. doi: 10.7717/peerj.10732 (PMC7899018; doi:10.7717/peerj.10732)
Supplement: Supplemental Information 4 — Raw data containing field and landscape characteristics. The meaning of each variable is as follows: Village: Unique identifier for each site, can be used to link data to other data provided. Latitude: Latitude of the site in DMS (Degrees Minutes Seconds) Longitude: Longitude of the site in DMS (Degrees Minutes Seconds) Overlap.1,000 m: Number showing the total proportion of overlap between the site and all neighbouring sites. SNH: Proportion of Semi-Natural Habitat (SNH) within a 1km radius of the site. Agricultural: Proportion of land used for agriculture within a 1km radius of the site. Width.1.m: Length in meters of one side of the field. Width.2.m: Length in meters of the side of the field perpendicular to ”Width.1.m”. Area.m2: Area of the field as calculated by multiplying ”Width.1.m” by ”Width.2.m”. Sum.PP.transects: Number of pigeon pea shubs covered by the three transects performed at each site. Proxy for planting density. edge.vegetation: Simplified description of the edge vegetation at each site. [file peerj-09-10732-s004.xlsx]

## Sheet: Sheet1
Village	Latitude	Longitude	Overlap.1000m	SNH	Agricultural	width.1.m	width.2.m	area.m2	Sum.PP.transects	edge.vegetation
V2	11°29'32.36"S	33°44'17.82"E	0	0.265491	0.432131	29.5	10.5	309.75	18	Shrubland
V4	11°31'46.96"S	33°44'5.82"E	0	0.282626	0.275049	20	8.5	170	29	Shrubland
V25	11° 7'15.03"S	33°53'4.03"E	0	0.0190109	0.245454	24.75	14.5	358.875	29	Vegatative weeds
V26	11° 29'35.56"S	33°47'21.04"E	0.0717572	0.154961	0.333132	8	22.2	177.6	36	Grass
V27	11° 29'5.61"S	33°48'7.80"E	0.0717572	0.125692	0.329736	7.2	23.1	166.32	41	Grass
V28	11° 22'59.38"S	33°46'41.18"E	0.456573	0.0644144	0.745526	17.5	23.9	418.25	30	Vegatative weeds
V29	11° 22'31.30"S	33°46'47.44"E	0.802069	0.101417	0.675537	28.3	20.4	577.32	41	Grass
V30	11° 22'19.15"S	33°47'13.93"E	0.455299	0.0655018	0.687641	27.3	13.3	363.09	23	Vegatative weeds
V31	11° 21'9.08"S	33°47'19.28"E	0	0.322548	0.534331	19.2	30.9	593.28	29	Grass
V32	11° 31'12.01"S	33°46'35.70"E	0	0.305963	0.287625	11.6	15.7	182.12	24	Grass
