# Supplementary material for: Higher bee abundance, but not pest abundance, in landscapes with more agriculture on a late-flowering legume crop in tropical smallholder farms
Source: PeerJ. 2021 Feb 19;9:e10732. doi: 10.7717/peerj.10732 (PMC7899018; doi:10.7717/peerj.10732)
Supplement: Supplemental Information 5 — Dataset calculating individual distances between the centre of each site. The meaning of each variable is as follows: Id: Unique site combination ID. Village: Unique identifier for each site, can be used to link data to other data provided. POINT_X: Longitude of ”Village” site in decimals. POINT_Y: Latitude of ”Village” site in decimals. Village_near: Site ID of paired village. END_X: Longitude of ”Village_near” site in decimals. END_Y: Latitude of ”Village_near” site in decimals. Distance/m: Calculated distance between the two sites in meters. [file peerj-09-10732-s005.xlsx]

## Sheet: PP_coordinates_XY
Id	Village	POINT_X	POINT_Y	Village_near	END_X	END_Y	Distance/m
1	V2	580518	8.72948e+06	V4	580144	8.72535e+06	4150.53
2	V2	580518	8.72948e+06	V25	596585	8.77052e+06	44068.5
3	V2	580518	8.72948e+06	V26	586069	8.72937e+06	5551.81
4	V2	580518	8.72948e+06	V27	587488	8.73028e+06	7016.01
5	V2	580518	8.72948e+06	V28	584894	8.74154e+06	12829.3
6	V2	580518	8.72948e+06	V29	585086	8.7424e+06	13705.6
7	V2	580518	8.72948e+06	V30	585890	8.74277e+06	14337.4
8	V2	580518	8.72948e+06	V31	586058	8.74492e+06	16408.4
9	V2	580518	8.72948e+06	V32	584687	8.72641e+06	5178.6
10	V4	580144	8.72535e+06	V25	596585	8.77052e+06	48068
11	V4	580144	8.72535e+06	V26	586069	8.72937e+06	7160.2
12	V4	580144	8.72535e+06	V27	587488	8.73028e+06	8849.05
13	V4	580144	8.72535e+06	V28	584894	8.74154e+06	16875.8
14	V4	580144	8.72535e+06	V29	585086	8.7424e+06	17757.2
15	V4	580144	8.72535e+06	V30	585890	8.74277e+06	18349.5
16	V4	580144	8.72535e+06	V31	586058	8.74492e+06	20452.3
17	V4	580144	8.72535e+06	V32	584687	8.72641e+06	4665.53
18	V25	596585	8.77052e+06	V26	586069	8.72937e+06	42470.8
19	V25	596585	8.77052e+06	V27	587488	8.73028e+06	41247.8
20	V25	596585	8.77052e+06	V28	584894	8.74154e+06	31244.9
21	V25	596585	8.77052e+06	V29	585086	8.7424e+06	30374
22	V25	596585	8.77052e+06	V30	585890	8.74277e+06	29732.4
23	V25	596585	8.77052e+06	V31	586058	8.74492e+06	27670.9
24	V25	596585	8.77052e+06	V32	584687	8.72641e+06	45683.7
25	V26	586069	8.72937e+06	V27	587488	8.73028e+06	1689.21
26	V26	586069	8.72937e+06	V28	584894	8.74154e+06	12229.5
27	V26	586069	8.72937e+06	V29	585086	8.7424e+06	13072
28	V26	586069	8.72937e+06	V30	585890	8.74277e+06	13407.3
29	V26	586069	8.72937e+06	V31	586058	8.74492e+06	15558
30	V26	586069	8.72937e+06	V32	584687	8.72641e+06	3265.66
31	V27	587488	8.73028e+06	V28	584894	8.74154e+06	11551.9
32	V27	587488	8.73028e+06	V29	585086	8.7424e+06	12354.7
33	V27	587488	8.73028e+06	V30	585890	8.74277e+06	12591.8
34	V27	587488	8.73028e+06	V31	586058	8.74492e+06	14711.6
35	V27	587488	8.73028e+06	V32	584687	8.72641e+06	4781.33
36	V28	584894	8.74154e+06	V29	585086	8.7424e+06	883.17
37	V28	584894	8.74154e+06	V30	585890	8.74277e+06	1585.06
38	V28	584894	8.74154e+06	V31	586058	8.74492e+06	3579.54
39	V28	584894	8.74154e+06	V32	584687	8.72641e+06	15133.4
40	V29	585086	8.7424e+06	V30	585890	8.74277e+06	885.4
41	V29	585086	8.7424e+06	V31	586058	8.74492e+06	2703.71
42	V29	585086	8.7424e+06	V32	584687	8.72641e+06	15999
43	V30	585890	8.74277e+06	V31	586058	8.74492e+06	2158.48
44	V30	585890	8.74277e+06	V32	584687	8.72641e+06	16409.2
45	V31	586058	8.74492e+06	V32	584687	8.72641e+06	18567.6
